# Supplementary material
Source: MDPI journal article supplement (https://www.mdpi.com/2306-5338/9/12/212)
Supplement: s1 [file s1 › hydrology-1999660-supplementary.pdf]

## Supplementary

**Table S1.** Demographic composition of the participants of questionnaire survey.

| VDC / Municipality | Gender |     | Age group |       |       |     | Ethnicity |          |        | Total |
|--------------------|--------|-----|-----------|-------|-------|-----|-----------|----------|--------|-------|
|                    | M      | F   | 0-17      | 18-49 | 50-60 | 60+ | Dalit     | Janajati | Others |       |
| Pawera             | 44     | 24  | 0         | 12    | 33    | 23  | 0         | 61       | 7      | 68    |
| Hasuliya           | 39     | 32  | 0         | 11    | 35    | 25  | 0         | 68       | 3      | 71    |
| Dekhatbhuli        | 34     | 37  | 0         | 18    | 32    | 21  | 0         | 69       | 2      | 71    |
| Shankarpur         | 38     | 30  | 0         | 9     | 39    | 20  | 0         | 45       | 23     | 68    |
| Jogbudha           | 43     | 29  | 0         | 10    | 38    | 24  | 10        | 0        | 62     | 72    |
| Aalitaal           | 37     | 34  | 0         | 13    | 32    | 26  | 9         | 0        | 62     | 71    |
| Rudreshwor         | 31     | 35  | 0         | 13    | 36    | 17  | 19        | 4        | 43     | 66    |
| Gokuleshwor        | 39     | 28  | 0         | 14    | 44    | 9   | 15        | 12       | 40     | 67    |
| Total              | 305    | 249 | 0         | 100   | 289   | 165 | 53        | 259      | 242    | 554   |

**Table S2.** Demographic composition of the participants of Focus Group Discussion (FGD).

| VDC / Municipality | Gender |    | Age group |       |       |     | Ethnicity |          |        | Total |
|--------------------|--------|----|-----------|-------|-------|-----|-----------|----------|--------|-------|
|                    | M      | F  | 0-17      | 18-49 | 50-60 | 60+ | Dalit     | Janajati | Others |       |
| Pawera             | 4      | 2  | 0         | 0     | 5     | 1   | 0         | 4        | 2      | 6     |
| Hasuliya           | 5      | 3  | 0         | 1     | 7     | 0   | 0         | 6        | 2      | 8     |
| Dekhatbhuli        | 0      | 5  | 0         | 1     | 4     | 0   | 0         | 5        | 0      | 5     |
| Shankarpur         | 4      | 2  | 0         | 0     | 6     | 0   | 1         | 3        | 2      | 6     |
| Jogbudha           | 0      | 5  | 0         | 2     | 2     | 1   | 2         | 1        | 2      | 5     |
| Aalitaal           | 5      | 3  | 0         | 0     | 7     | 1   | 3         | 2        | 3      | 8     |
| Rudreshwor         | 5      | 3  | 0         | 0     | 6     | 2   | 3         | 1        | 4      | 8     |
| Gokuleshwor        | 0      | 6  | 0         | 0     | 5     | 1   | 0         | 2        | 4      | 6     |
| Total              | 23     | 29 | 0         | 4     | 42    | 6   | 9         | 24       | 19     | 52    |

**Table S3.** Key aspects of the questionnaire used in the household perception survey.

| Temperature                              | Precipitation                                       | Impacts of climate change                                                           |
|------------------------------------------|-----------------------------------------------------|-------------------------------------------------------------------------------------|
| How has the overall temperature changed? | How has the annual precipitation amount changed?    | How has the water availability in rivers, wells, and other water resources changed? |
| How has the summer temperature changed?  | How has the monsoon precipitation amount changed?   | How has the annual incidence of floods and landslide incidences changed?            |
| How has the winter temperature changed?  | How has the winter precipitation amount changed?    | How has the annual incidence of drought events changed?                             |
| How has the duration of summer changed?  | How has the intensity of monsoon rainfall changed?  | Please mention 3 major impacts of climate change on agriculture.                    |
| How has the duration of winter changed?  | How has the annual number of rainfall days changed? | Please mention what you are doing to minimize the impacts                           |

**Table S4.** Observed trends of change in precipitation at different stations. (Note: figures in bold represents statistically significant trends at 5 % level of significance).

| S/N                                     | Station Name        | Index in<br>Figure 1 | Annual<br>Trend | Monsoon<br>Trend | Post-mon-<br>soon Trend | Pre-mon-<br>soon Trend | Winter<br>Trend |
|-----------------------------------------|---------------------|----------------------|-----------------|------------------|-------------------------|------------------------|-----------------|
| 1                                       | Belauri Santipur    | 9                    | -0.887          | -0.492           | 0.750                   | -1.08                  | -0.081          |
| 2                                       | Patan (West)        | 4                    | -2.394          | 0.217            | 0.179                   | -1.61                  | 0.079           |
| 3                                       | Sandepani           | 11                   | 7.060           | 6.475            | 0.346                   | 2.36                   | 0.342           |
| 4                                       | Dhangadhi (Atariya) | 10                   | 8.439           | 5.077            | -0.120                  | 0.11                   | 0.663           |
| 5                                       | Kakerpakha          | 1                    | -4.615          | -1.722           | -0.977                  | 0.23                   | -0.280          |
| 6                                       | Dadeldhura          | 5                    | 0.793           | 2.640            | 0.359                   | -0.54                  | 0.560           |
| 7                                       | Baitadi             | 2                    | -8.409          | -5.462           | -0.286                  | -0.37                  | -1.391          |
| 8                                       | Sitapur             | 12                   | -5.239          | -1.243           | -0.207                  | 1.06                   | 0.289           |
| 9                                       | Chisapani (Karnali) | 8                    | -4.265          | -1.409           | <b>2.107</b>            | -0.79                  | 0.214           |
| 10                                      | Satbanjh            | 3                    | -2.971          | -1.188           | <b>0.994</b>            | 1.95                   | -1.338          |
| 11                                      | Godavari (West)     | 7                    | 17.466          | 13.572           | 1.191                   | <b>1.67</b>            | 1.161           |
| 12                                      | Tikapur             | 13                   | 0.615           | -0.803           | <b>1.064</b>            | <b>1.69</b>            | 0.632           |
| 13                                      | Mahendranagar       | 6                    | 2.885           | 3.633            | 1.362                   | -0.39                  | 0.982           |
| Maximum                                 |                     |                      | 17.466          | 13.572           | 2.107                   | 2.356                  | 1.161           |
| Minimum                                 |                     |                      | -8.409          | -5.462           | -0.977                  | -1.606                 | -1.391          |
| Average                                 |                     |                      | 0.652           | 1.484            | 0.520                   | 0.330                  | 0.141           |
| Number of stations with positive trends |                     |                      | 6               | 6                | 9                       | 7                      | 9               |
| Number of stations with negative trends |                     |                      | 7               | 7                | 4                       | 6                      | 4               |

**Table S5.** Observed trends of change in maximum temperature at different stations. (Note: figures in bold represents statistically significant trends at 5 % level of significance).

| S.N.                                    | Station Name        | Index in<br>Figure 1 | Annual<br>Trend | Monsoon<br>Trend | Post-mon-<br>soon Trend | Pre-mon-<br>soon Trend | Winter<br>Trend |
|-----------------------------------------|---------------------|----------------------|-----------------|------------------|-------------------------|------------------------|-----------------|
| 1                                       | Godavari (West)     | 7                    | <b>0.036</b>    | 0.011            | <b>0.063</b>            | <b>0.052</b>           | 0.026           |
| 2                                       | Tikapur             | 13                   | 0.021           | <b>0.035</b>     | <b>0.028</b>            | <b>0.042</b>           | -0.003          |
| 3                                       | Dhangadhi (Atariya) | 10                   | -0.004          | 0.010            | 0.005                   | 0.027                  | -0.017          |
| 4                                       | Chisapani (Karnali) | 8                    | -0.019          | -0.007           | -0.018                  | -0.007                 | <b>-0.019</b>   |
| 5                                       | Mahendranagar       | 6                    | <b>0.022</b>    | -0.002           | -0.012                  | 0.018                  | <b>-0.037</b>   |
| 6                                       | Patan (West)        | 4                    | <b>0.057</b>    | <b>0.051</b>     | 0.030                   | <b>0.100</b>           | <b>0.051</b>    |
| 7                                       | Dadeldhura          | 5                    | <b>0.106</b>    | <b>0.081</b>     | <b>0.118</b>            | <b>0.110</b>           | <b>0.141</b>    |
| Maximum                                 |                     |                      | 0.106           | 0.081            | 0.118                   | 0.110                  | 0.141           |
| Minimum                                 |                     |                      | -0.019          | -0.007           | -0.018                  | -0.007                 | -0.037          |
| Average                                 |                     |                      | 0.031           | 0.026            | 0.031                   | 0.049                  | 0.020           |
| Number of stations with positive trends |                     |                      | 5               | 5                | 5                       | 6                      | 3               |
| Number of stations with negative trends |                     |                      | 2               | 2                | 2                       | 1                      | 4               |

**Table S6.** Observed trends of change in minimum temperature at different stations. (Note: figures in bold represents statistically significant trends at 5% level of significance).

| S.N.                                    | Station Name        | Index in<br>Figure 1 | Annual<br>Trend | Monsoon<br>Trend | Post-mon-<br>soon Trend | Pre-mon-<br>soon Trend | Winter<br>Trend |
|-----------------------------------------|---------------------|----------------------|-----------------|------------------|-------------------------|------------------------|-----------------|
| 1                                       | Godavari (West)     | 7                    | -0.001          | 0.004            | -0.006                  | 0.012                  | -0.017          |
| 2                                       | Tikapur             | 13                   | -0.040          | -0.002           | -0.033                  | -0.002                 | -0.048          |
| 3                                       | Dhangadhi (Atariya) | 10                   | -0.012          | 0.007            | 0.015                   | 0.000                  | <b>0.043</b>    |
| 4                                       | Chisapani (Karnali) | 8                    | <b>0.026</b>    | <b>0.027</b>     | 0.007                   | 0.019                  | 0.018           |
| 5                                       | Mahendranagar       | 6                    | <b>0.022</b>    | 0.022            | 0.009                   | <b>0.035</b>           | <b>0.031</b>    |
| 6                                       | Patan (West)        | 4                    | 0.016           | 0.032            | 0.002                   | 0.045                  | 0.008           |
| 7                                       | Dadeldhura          | 5                    | -0.013          | 0.003            | <b>-0.031</b>           | -0.006                 | -0.017          |
| Maximum                                 |                     |                      | 0.026           | 0.032            | 0.015                   | 0.045                  | 0.043           |
| Minimum                                 |                     |                      | -0.040          | -0.002           | -0.033                  | -0.006                 | -0.048          |
| Average                                 |                     |                      | 0.000           | 0.013            | -0.005                  | 0.015                  | 0.003           |
| Number of stations with positive trends |                     |                      | 3               | 6                | 4                       | 5                      | 4               |
| Number of stations with negative trends |                     |                      | 4               | 1                | 3                       | 2                      | 3               |
